# Supplementary material for: Allogeneic stem cell transplantation benefits for patients ≥ 60 years with acute myeloid leukemia and FLT3 internal tandem duplication: a study from the Acute Leukemia Working Party of the European Society for Blood and Marrow Transplantation
Source: PubMed Central journal article supplement — Haematologica. 2017 Dec 14;103(2):256–65. doi: 10.3324/haematol.2017.178251 (PMC5792270; doi:10.3324/haematol.2017.178251), 2018-02
Supplement: 2017.178251.POIRE_SUPPL.pdf [file 2017.178251.POIRE_SUPPL.pdf]

# Allogeneic stem cell transplantation benefits for patients $\geq 60$ years with acute myeloid leukemia and *FLT3* internal tandem duplication: a study from the Acute Leukemia Working Party of the European Society for Blood and Marrow Transplantation

Xavier Poiré,<sup>1</sup> Myriam Labopin,<sup>2,3</sup> Emmanuelle Polge,<sup>2,3</sup> Jakob Passweg,<sup>4</sup> Charles Craddock,<sup>5</sup> Didier Blaise,<sup>6</sup> Jan J. Cornelissen,<sup>7</sup> Liisa Volin,<sup>8</sup> Nigel H. Russell,<sup>9</sup> Gérard Socié,<sup>10</sup> Mauricette Michallet,<sup>11</sup> Nathalie Fegueux,<sup>12</sup> Patrice Chevallier,<sup>13</sup> Arne Brecht,<sup>14</sup> Mathilde Hunault-Berger,<sup>15</sup> Mohamad Mohty,<sup>2,3\*</sup> Jordi Esteve<sup>16\*</sup> and Arnon Nagler<sup>2,17\*</sup>

<sup>1</sup>Section of Hematology, Cliniques Universitaires Saint-Luc, Brussels, Belgium; <sup>2</sup>Acute Leukemia Working Party of the EBMT; <sup>3</sup>Service d'Hématologie, Hôpital Saint-Antoine, Paris, France; <sup>4</sup>Hematology, University Hospital, Basel, Switzerland; <sup>5</sup>Center for Clinical Haematology, Queen Elizabeth Hospital, Birmingham, UK; <sup>6</sup>Programme de Transplantation et Thérapie Cellulaire, Centre de Recherche en Cancérologie de Marseille, Institut Paoli Calmettes, France; <sup>7</sup>Daniel den Hoed Cancer Centre, Erasmus Medical Center, Rotterdam, the Netherlands; <sup>8</sup>Stem Cell Transplantation Unit, HUH Comprehensive Cancer Center, Helsinki, Finland; <sup>9</sup>Nottingham City Hospital, UK; <sup>10</sup>Department of Hematology, Hôpital Saint-Louis, Paris, France; <sup>11</sup>Service Hématologie, Centre Hospitalier Lyon Sud, France; <sup>12</sup>Département d'Hématologie Clinique, CHU Lapeyronie, Montpellier, France; <sup>13</sup>Département d'Hématologie, CHU Nantes, France; <sup>14</sup>Deutsche Klinik für Diagnostik, KMT Zentrum, Wiesbaden, Germany; <sup>15</sup>Service des Maladies du Sang, CHRU, Angers, France; <sup>16</sup>Hematology Department, IDIBAPS, Hospital Clinic, Barcelona, Spain and <sup>17</sup>Chaim Sheba Medical Center, Tel-Hashomer, Israel

\*MM, JE and AN contributed equally to this work

©2017 Ferrata Storti Foundation. This is an open-access paper. doi:10.3324/haematol.2017.178251

Received: August 8, 2017.

Accepted: December 7, 2017.

Pre-published: December 14, 2017.

Correspondence: xavier.poire@uclouvain.be

### Supplemental Table

**Multivariate analysis using a Cox proportional hazards model performed on Graft-versus-host and relapse free survival within the all cohort (N=291) and the CR1 cohort (N=212)**

**Only variables with p<0.15 in univariate analysis**

|                     |                                  | p        | HR   | 95% CI |      |
|---------------------|----------------------------------|----------|------|--------|------|
| All cohort<br>N=291 | Age (per year)                   | 0.41     | 0.98 | 0.93   | 1.03 |
|                     | Status at SCT (CR1 as reference) |          |      |        |      |
|                     | CR2                              | 0.004    | 2.11 | 1.27   | 3.48 |
|                     | Advanced                         | <0.00001 | 3.12 | 2.05   | 4.74 |
|                     | Type of donor (MSD as reference) |          |      |        |      |
|                     | 10/10 UD                         | 0.18     | 1.28 | 0.88   | 1.85 |
|                     | 9/10 UD                          | 0.43     | 1.23 | 0.74   | 2.05 |
|                     | Karnofsky > 90%                  | 0.79     | 0.95 | 0.67   | 1.35 |
|                     | RIC                              | 0.20     | 0.77 | 0.52   | 1.14 |
|                     | Donor CMV positivity             | 0.01     | 1.56 | 1.09   | 2.21 |
| In vivo TCD         | 0.04                             | 0.71     | 0.50 | 0.99   |      |
| CR1<br>N=212        | Age (per year)                   | 0,19     | 0.95 | 0.87   | 1.03 |
|                     | Type of donor (MSD as reference) |          |      |        |      |
|                     | 10/10 UD                         | 0.34     | 1.29 | 0.76   | 2.16 |
|                     | 9/10 UD                          | 0.17     | 1.68 | 0.80   | 3.50 |
|                     | Kanofsky > 90%                   | 0.65     | 0.89 | 0.54   | 1.46 |
|                     | RIC                              | 0.09     | 0.61 | 0.34   | 1.09 |
|                     | Donor CMV positivity             | 0.44     | 1.21 | 0.75   | 1.95 |
|                     | Diagnosis to CR1 > 42 days       | 0.06     | 1.56 | 0.99   | 2.45 |
|                     | CR1 to SCT > 98 days             | 0.83     | 1.05 | 0.66   | 1.68 |
| In vivo TCD         | 0.04                             | 0.63     | 0.40 | 0.97   |      |
