# Supplementary material for: Allogeneic stem cell transplantation benefits for patients ≥ 60 years with acute myeloid leukemia and FLT3 internal tandem duplication: a study from the Acute Leukemia Working Party of the European Society for Blood and Marrow Transplantation
Source: PubMed Central journal article supplement — Haematologica. 2017 Dec 14;103(2):256–65. doi: 10.3324/haematol.2017.178251 (PMC5792270; doi:10.3324/haematol.2017.178251), 2018-02
Supplement: 2017_178251-Disclosures_and_Contributions.pdf [file 2017_178251-Disclosures_and_Contributions.pdf]

Haematologica  
HAEMATOL/2017/178251  
Version 3

Allogeneic stem cell transplantation benefits for patients  $\geq 60$  years with acute myeloid leukemia and FLT3-ITD; a study from the Acute Leukemia Working Party (ALWP) of the European Society of Blood and Marrow Transplantation (EBMT)

Xavier Poiré, Myriam Labopin, Emmanuelle Polge, Jakob Passweg, Charles Craddock, Didier Blaise, Jan J. Cornelissen, Liisa Volin, Nigel H. Russell, Gérard Socié, Mauricette Michallet, Nathalie Fegueux, Patrice Chevallier, Arne Brecht, Mathilde Hunault-Berger, Mohamad Mohty, Jordi Esteve, and Arnon Nagler

Collaborative Groups: Acute Leukemia Working Party of the European Society of Blood and Marrow Transplantation)

Disclosures: None of the co-authors have any conflict of interest with the work presented in this manuscript.

Contributions: XP, JE and AN designed the study; XP, ML, JE and AN analysed the data; XP wrote the paper; MM, JE and AN reviewed the paper; JP, CC, DB, JC, LV, NR, GS, MM, YH, PC, GS, NI provide the data; ML, JP, CC, DB, JC, LV, NR, GS, MM, YH, PC, GS, NI approved the manuscript.
