# Supplementary material for: Allogeneic stem cell transplantation benefits for patients ≥ 60 years with acute myeloid leukemia and FLT3 internal tandem duplication: a study from the Acute Leukemia Working Party of the European Society for Blood and Marrow Transplantation
Source: PubMed Central journal article supplement — Haematologica. 2017 Dec 14;103(2):256–65. doi: 10.3324/haematol.2017.178251 (PMC5792270; doi:10.3324/haematol.2017.178251), 2018-02
Supplement: HAEMATOL-2017-178251v3-Poire-01.pdf [file HAEMATOL-2017-178251v3-Poire-01.pdf]

# A retrospective study based on the EBMT registry to address the outcomes of *FLT3*-ITD AML in patients with an age equal or over 60-year old undergoing allogeneic stem cell transplantation

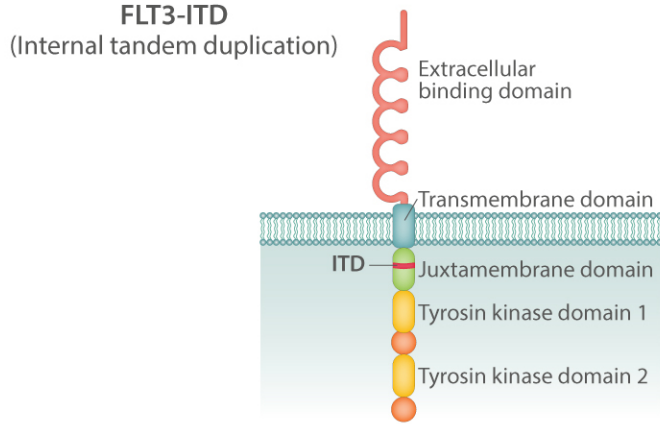

- One of the most frequent mutations in acute myeloid leukemia (AML)
-  High risk of relapse and worse survival
- Standard indication for allogeneic stem cell transplantation

 **291** ≥ 60 year-old patients harboring *FLT3*-ITD AML

 **82%** Reduced intensity conditioning

 **55%** Unrelated donors

|                                                                                       | 1 <sup>st</sup> remission | 2 <sup>nd</sup> remission | Active disease |
|---------------------------------------------------------------------------------------|---------------------------|---------------------------|----------------|
|  (n) | 212 (p<0.005)             | 37 (p<0.005)              | 42 (p<0.005)   |
| 2-year LFS                                                                            | 56%                       | 22%                       | 10%            |

## Conclusions

- Stem cell transplantation in early disease phase for eligible patient with *FLT3*-ITD AML
- Sibling donors or fully matched unrelated donors are the best donors even in elderly population
